# Supplementary material
Source: publisher figshare collection journal article supplement (https://tandf.figshare.com/ndownloader/files/1893311)
Supplement: Supplementary file 1 [file 1893311]

# Appendix

Table S1. Species showing significant absolute increase or decrease in occurrence. n0,1: Number of plots in which species occurred in original and the resampling dataset. a0,1: Mean abundance of the species in the original and the resampled dataset. Significance of frequency change: ***, *P*<0.001; **, *P*<0.01; *, *P*<0.05

| Species | n0 | n1 | |  | a0 | a1 |
| --- | --- | --- | --- | --- | --- | --- |
| Increased frequency | | |
| *Alnus glutinosa* | 3 | 28 | | *** | 0,02 | 7,42 |
| *Angelica sylvestris* | 10 | 25 | | * | 0,06 | 0,38 |
| *Calamagrostis epigejos* | 0 | 19 | | *** | 0,00 | 5,66 |
| *Calystegia sepium* | 0 | 17 | | *** | 0,00 | 1,86 |
| *Carex acutiformis* | 11 | 28 | | ** | 1,56 | 4,42 |
| *Circaea lutetiana* | 0 | 10 | | ** | 0,00 | 0,40 |
| *Cirsium arvense* | 1 | 9 | | * | 0,06 | 0,29 |
| *Cirsium oleraceum* | 6 | 35 | | *** | 0,02 | 1,01 |
| *Crataegus monogyna* | 0 | 8 | | ** | 0,00 | 0,84 |
| *Deschampsia cespitosa* | 5 | 34 | | *** | 0,07 | 4,51 |
| *Dryopteris carthusiana* | 5 | 15 | | * | 0,04 | 0,79 |
| *Dryopteris filix-mas* | 0 | 5 | | * | 0,00 | 0,12 |
| *Eupatorium cannabinum* | 18 | 36 | | * | 0,59 | 3,27 |
| *Festuca gigantea* | 0 | 13 | | *** | 0,00 | 1,14 |
| *Festuca rubra* | 0 | 6 | | * | 0,00 | 0,79 |
| *Frangula alnus* | 6 | 20 | | ** | 0,78 | 0,63 |
| *Galeopsis tetrahit* | 0 | 11 | | *** | 0,00 | 0,70 |
| *Galium aparine* | 2 | 22 | | *** | 0,01 | 0,87 |
| *Geranium palustre* | 0 | 5 | | * | 0,00 | 0,35 |
| *Geranium robertianum* | 0 | 11 | | *** | 0,00 | 0,64 |
| *Impatiens noli-tangere* | 0 | 14 | | *** | 0,00 | 0,70 |
| *Juncus effusus* | 3 | 24 | | *** | 0,00 | 2,08 |
| *Lathyrus pratensis* | 1 | 8 | | * | 0,01 | 0,16 |
| *Lycopus europaeus* | 18 | 33 | | * | 0,18 | 0,85 |
| *Lysimachia vulgaris* | 23 | 51 | | ** | 0,98 | 2,59 |
| *Phragmites australis* | 17 | 37 | | ** | 9,80 | 22,95 |
| *Quercus robur* | 4 | 12 | | * | 0,01 | 0,36 |
| *Scrophularia umbrosa* | 0 | 8 | | ** | 0,00 | 0,26 |
| *Scutellaria galericulata* | 10 | 21 | | * | 0,07 | 0,16 |
| *Solanum dulcamara* | 10 | 25 | | * | 0,12 | 0,78 |
| *Sonchus palustris* | 0 | 4 | | * | 0,00 | 0,04 |
| *Sorbus aucuparia* | 3 | 11 | | * | 0,02 | 0,33 |
| *Urtica dioica* | 5 | 41 | | *** | 2,44 | 8,94 |
| *Valeriana officinalis* | 0 | 5 | | * | 0,00 | 0,26 |
| *Viburnum opulus* | 2 | 9 | | * | 0,00 | 0,07 |
| *Vicia cracca* | 2 | 16 | | *** | 0,00 | 0,20 |
| Decreased frequency | | | | | | |
| *Acorus calamus* | 8 | 1 | | * | 0,13 | 0,06 |
| *Agrostis stolonifera* | 48 | 7 | | *** | 2,19 | 0,25 |
| *Alisma plantago-aquatica* | 5 | 0 | | * | 0,26 | 0,00 |
| *Atriplex prostrata* | 9 | 2 | | * | 0,16 | 0,01 |
| *Berula erecta* | 18 | 8 | | * | 1,23 | 0,33 |
| *Betula humilis* | 8 | 1 | | * | 0,35 | 0,00 |
| *Briza media* | 16 | 1 | | *** | 0,13 | 0,01 |
| *Caltha palustris* | 32 | 10 | | *** | 0,62 | 0,08 |
| *Cardamine pratensis* | 34 | 0 | | *** | 0,45 | 0,00 |
| *Carex acuta* | 10 | 0 | | ** | 2,31 | 0,00 |
| *Carex diandra* | 23 | 4 | | *** | 1,89 | 0,23 |
| *Carex flacca* | 10 | 0 | | ** | 0,30 | 0,00 |
| *Carex lasiocarpa* | 24 | 1 | | *** | 5,15 | 0,01 |
| *Carex lepidocarpa* | 9 | 0 | | ** | 0,26 | 0,00 |
| *Carex nigra* | 39 | 9 | | *** | 3,93 | 0,32 |
| *Carex panicea* | 26 | 5 | | *** | 0,72 | 0,12 |
| *Carex pulicaris* | 10 | 0 | | ** | 0,59 | 0,00 |
| *Carex rostrata* | 44 | 10 | | *** | 7,42 | 1,49 |
| *Carexdioica* | 15 | 0 | | *** | 0,52 | 0,00 |
| *Cirsium palustre* | 41 | 19 | | ** | 0,39 | 0,11 |
| *Crepis paludosa* | 18 | 7 | | * | 0,15 | 0,06 |
| *Dactylorhiza incarnata* | 22 | 3 | | *** | 0,17 | 0,02 |
| *Drosera rotundifolia* | 6 | 0 | | * | 0,12 | 0,00 |
| *Epipactis palustris* | 14 | 2 | | ** | 0,41 | 0,01 |
| *Equisetum palustre* | 5 | 0 | | * | 0,06 | 0,00 |
| *Eriophorum angustifolium* | 26 | 1 | | *** | 1,38 | 0,01 |
| *Helictotrichon pubescens* | 7 | 0 | | ** | 0,02 | 0,00 |
| *Hydrocotyle vulgaris* | 29 | 7 | | *** | 2,69 | 0,48 |
| *Juncus alpinus* | 5 | 0 | | * | 0,03 | 0,00 |
| *Juncus articulatus* | 26 | 3 | | *** | 0,67 | 0,09 |
| *Lathyrus palustris* | 4 | 0 | | * | 0,02 | 0,00 |
| *Lemna minor* | 14 | 5 | | * | 1,90 | 0,22 |
| *Linum catharticum* | 9 | 0 | | ** | 0,20 | 0,00 |
| *Liparis loeselii* | 6 | 0 | | * | 0,01 | 0,00 |
| *Luzula multiflora* | 14 | 2 | | ** | 0,12 | 0,03 |
| *Lysimachia thyrsiflora* | 29 | 14 | | * | 1,94 | 0,39 |
| *Menyanthes trifoliata* | 32 | 7 | | *** | 11,64 | 0,79 |
| *Myosotis scorpioides* | 37 | 21 | | * | 0,22 | 0,11 |
| *Parnassia palustris* | 7 | 1 | | * | 0,17 | 0,00 |
| *Potentilla palustris* | 47 | 18 | | *** | 9,74 | 0,70 |
| *Ranunculus acris* | 9 | 0 | | ** | 0,05 | 0,00 |
| *Rorippa amphibia* | 7 | 1 | | * | 0,76 | 0,01 |
| *Rorippa palustris* | 4 | 0 | | * | 0,42 | 0,00 |
| *Salix aurita* | 19 | 8 | | * | 0,84 | 1,05 |
| *Salix pentandra* | 31 | 8 | | *** | 0,85 | 0,12 |
| *Salix repens* | 25 | 1 | | *** | 0,63 | 0,01 |
| *Selinum carvifolia* | 15 | 6 | | * | 0,08 | 0,12 |
| *Sileneflos-cuculi* | 23 | 2 | | *** | 0,24 | 0,00 |
| *Sium latifolium* | 9 | 0 | | ** | 0,06 | 0,00 |
| *Stellaria palustris* | 35 | 11 | | *** | 0,35 | 0,08 |
| *Succisa pratensis* | 25 | 1 | | *** | 0,29 | 0,01 |
| *Triglochin palustre* | 11 | 1 | | ** | 0,64 | 0,00 |
| *Typha latifolia* | 19 | 4 | | ** | 0,41 | 0,08 |
| *Utricularia intermedia* | 4 | 0 | | * | 0,09 | 0,00 |
| *Vaccinium oxycoccos* | 10 | 1 | | ** | 0,35 | 0,01 |
| *Vaccinium uliginosum* | 4 | 0 | | * | 0,08 | 0,00 |
| *Valeriana dioica* | 41 | 9 | | *** | 1,85 | 0,08 |
| *Veronica anagallis-aquatica* | 5 | 0 | | * | 0,03 | 0,00 |
| *Viola palustris* | 12 | 0 | | *** | 0,30 | 0,00 |
